# Supplementary material
Source: PubMed Central journal article supplement (PMC4012483)
Supplement: supp_113.160325_FigureS1.pdf [file supp_113.160325_FigureS1.pdf]

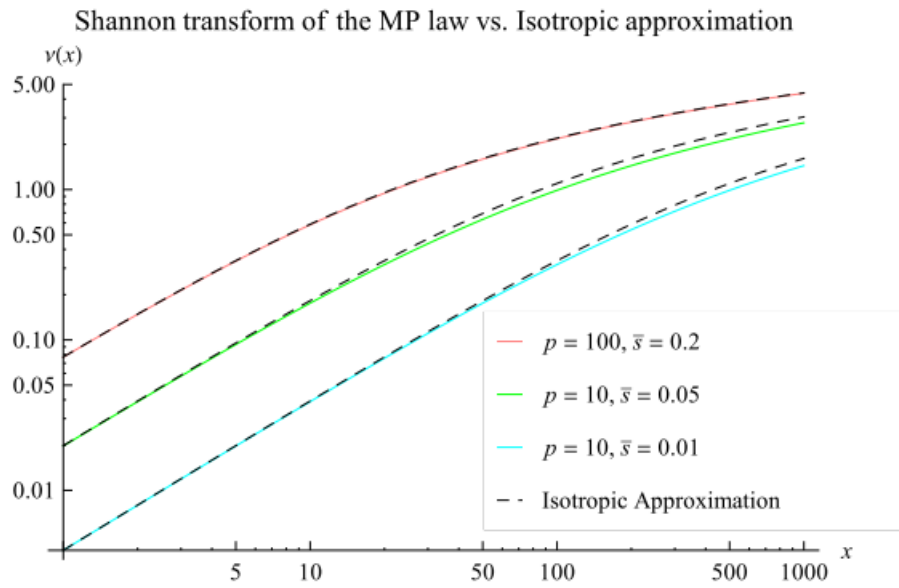

**Figure S1 Convergence of the Shannon transform to the isotropic approximation**

The Shannon transform of the M-P law ( $v_{H,H^*}(x)$  with  $\lambda_{H,H^*} \sim MP(\beta, \zeta)$ , see eq. A1.3) is compared to the isotropic approximation ( $v(x) \approx \log(1 + \tilde{\lambda} x)$ ) where  $\tilde{\lambda} = \beta\zeta = 2\bar{s}/n$  where  $\bar{s} = -E(s)$  is the mean (deleterious) effect of mutations. The parameters are indicated on the graph, with  $n = 5$  and recalling that  $\beta = p/n$  and  $\zeta = 2\bar{s}/p$ . The isotropic approximation proves accurate over a wide range of parameter values.
