# Supplementary material
Source: PubMed Central journal article supplement (PMC4012483)
Supplement: supp_113.160325_FileS1.pdf [file supp_113.160325_FileS1.pdf]

## File S1

### Approximations to the LSD for some classes of random matrices

In this appendix, I first state several results on the Limit Spectral Distribution (LSD) of some large random covariance matrices. This LSD is the nonrandom limit of the distribution of the eigenvalues of a random matrix, as its dimensions get large (here as  $n, p \rightarrow \infty$ ). The first section merely states various known results from Random matrix Theory: most are summarized in (TULINO and VERDÙ 2004). Then I derive an approximation for the LSD of  $\mathbf{M}$  in the integrative phenotypic network model presented in the main text (**Figure 1**), and for key quantities related to the mutant fitness distribution. In what follows, I refer to the pdf of the spectral distribution of a given matrix  $\mathbf{X}$  as  $\rho_{\mathbf{X}}$  and to the corresponding Limit Spectral distribution (LSD) of this matrix as  $\tilde{\rho}_{\mathbf{X}}$ . I refer to any of the transforms of this LSD by an index referring to that matrix. All the derivations of this Appendix can be checked in a Mathematica® (WOLFRAM RESEARCH 2012) notebook (**file S3**, in freely readable [.cdf] format) available for download at **XXX**.

#### A) The Marchenko-Pastur law and its properties

**Limiting Spectral Distribution (LSD):** Central to our derivations is the Marchenko - Pastur (M-P) law, which provides the LSD of a covariance matrix with random entries. Consider a  $n \times p$  matrix  $\mathbf{H}$  whose entries  $h_{ij}$  are randomly and independently drawn from possibly different distributions. These distributions are arbitrary in nature but have mean zero, variance  $1/n$  and fourth moments of order  $O(1/n^2)$ , i.e. they are 'standard' zero mean distributions, not too leptokurtic (normal, extreme value, uniform, etc.). Then, if  $\zeta > 0$  is an arbitrary scale factor, the random  $n \times n$  matrix  $\zeta \mathbf{H} \cdot \mathbf{H}^*$  is called a sample covariance matrix. Its name comes from the fact that  $\zeta \mathbf{H} \cdot \mathbf{H}^*$  can describe the covariance matrix in a sample (of size  $p$ ) from a multivariate distribution with covariance matrix  $\zeta \mathbf{I}_n$ . When the entries of  $\mathbf{H}$  are normally distributed,  $n \mathbf{H} \cdot \mathbf{H}^*$  follows the standard Wishart distribution:  $n \mathbf{H} \cdot \mathbf{H}^* \sim W_p(\mathbf{I}_n)$  with  $p$  degrees of freedom. As  $(p, n) \rightarrow \infty$  with a fixed ratio ( $p/n \rightarrow \beta$ ), the spectral distribution of  $\mathbf{H} \cdot \mathbf{H}^*$  converges to a nonrandom LSD whose pdf is given by eq. (1.12) in (TULINO and VERDÙ 2004)

$$\rho_{\mathbf{H} \cdot \mathbf{H}^*} \Rightarrow \tilde{\rho}_{\mathbf{H} \cdot \mathbf{H}^*}(x) = (1 - \beta)^+ \delta(x) + \frac{\sqrt{(b-x)(x-a)}}{2\pi\zeta x}, \quad x \in [a, b], \quad (A1.1)$$
$$a = \zeta(1 - \sqrt{\beta})^2 \quad \text{and} \quad b = \zeta(1 + \sqrt{\beta})^2$$

where  $(x)^+ = \max(x, 0)$  and  $\delta(\cdot)$  is the Dirac delta function.

This pdf has a point mass at zero with weight  $1 - \beta$  whenever  $0 < \beta < 1$ , plus a bulk of positive eigenvalues with weight  $\min(\beta, 1)$ . When  $\beta \geq 1$  (our case of interest), the left hand term vanishes and all eigenvalues are strictly positive: we then retrieve eq. (3) of the main text. The pdf of the bulk is  $\rho_{+(x)} = \rho(\lambda|\lambda > 0) = \sqrt{(b-x)(x-a)}/(2\pi\zeta\lambda\min(\beta, 1))$ . As stated in main text, I refer to this

distribution as the scaled M-P law with scale parameter  $\zeta$  and ratio index  $\beta$  and denote the result by the stochastic representation  $\lambda_{\zeta \mathbf{H}, \mathbf{H}^*} \sim MP(\beta, \zeta)$ . The mean eigenvalue is  $E(\lambda) = \zeta \beta$ , with variance  $V(\lambda) = \zeta^2 \beta$ . Note that the original (and more standard) statement of the M-P law (TULINO and VERDÙ 2004; BAI and SILVERSTEIN 2010) is in terms of the LSD of  $\mathbf{H}^* \cdot \mathbf{H}$ , which has ratio index  $1/\beta$  and corresponding scale  $\zeta\beta$ :  $\lambda_{\mathbf{H}^* \cdot \mathbf{H}} \sim MP(1/\beta, \zeta\beta)$  in our notation. Note also that, for notational simplicity, I drop the reference to the scaling factor  $\zeta$  in the indexing when referring to the LSD of sample covariance matrices ( $\tilde{\rho}_{\mathbf{H}, \mathbf{H}^*}(x)$ ,  $\nu_{\mathbf{H}, \mathbf{H}^*}(x)$  etc.).

One powerful property of the M-P law (and of random matrix theory in general) is that the actual spectral distributions of finite random covariance matrices converge quickly to their limit: for any single draw of a matrix  $\mathbf{H}$  with dimensions, say,  $n = 10$  and  $p = 100$  the spectral distribution of  $\mathbf{H} \cdot \mathbf{H}^*$  is already well described by the M-P law given above, in that it is bounded within the predicted domain  $[a, b]$  in eq. (A1.1), and that the pdf  $\rho(x)$  is close to the M-P law. However, it is difficult to represent this pdf with small  $\min(n, p)$  as there are then only few eigenvalues to show. This is why I show examples with larger dimensions (e.g.  $n = 100, p = 500$ ). However, when simulating the DFE I will use smaller parameter values and show the convergence of the DFE to the predicted distribution based on Random Matrix Theory.

**Transforms of the LSD:** Various transforms of the LSD of random matrices have been defined in Random Matrix Theory, I propose here a quick overview, drawn from section 2.2 of (TULINO and VERDÙ 2004). The purpose of these transforms is akin to that of generating functions in standard probability theory. These transforms can be derived from one another and allow to derive various properties of the LSD, or to compute the LSD of the sum or product of random matrices, which will prove useful in our case. Each transform fully characterizes a given LSD, just as the pdf  $\tilde{\rho}(x)$  does. The mutual relationships between these transforms are illustrated in the notebook **file S3**.

Let  $\tilde{\rho}(x)$  be the pdf of the LSD of a random matrix, defined on some finite or infinite range  $[\lambda_{min}, \lambda_{max}]$ . The first important transform is the Stieltjes transform:  $S(z) = \int_{\lambda_{min}}^{\lambda_{max}} 1/(x - z)\rho(x)dx$  with  $z \in \mathbb{C}$  the set of complex numbers. It provides the range and pdf of the eigenvalues of the matrix, in particular  $\tilde{\rho}(x) = \lim_{\omega \rightarrow 0^+} S(x + \mathbf{i}\omega)$  where  $\mathbf{i}$  is the complex unit number. The  $\eta$  transform:  $\eta(z) = \int_{\lambda_{min}}^{\lambda_{max}} 1/(1 + zx)\tilde{\rho}(x)dx$ , with  $z \in \mathbb{R}^+$  (positive real numbers) is defined for positive semi-definite matrices only (with eigenvalues all positive or zero,  $[\lambda_{min}, \lambda_{max}] \subset \mathbb{R}^+$ ). This function is a generating function for the raw moments of the LSD: we have  $\eta(0) = 1$  and  $\eta[-z] = \sum_{k=0}^{\infty} z^k E(\lambda^k)$ . The  $\eta$  transform is related to the Stieltjes transform via  $\eta(z) = S(-1/z)/z$ . For the scaled M-P law in eq. (A1.1), the  $\eta$  transform is given by

$$\begin{aligned} \eta_{\mathbf{H}, \mathbf{H}^*}(z) &= 1 - \phi(z)/(4z\zeta) \\ \phi(z) &= (\sqrt{bz+1} - \sqrt{az+1})^2 \end{aligned} \quad , \quad (A1.2)$$

where  $(a, b)$  are given in eq. (A1.1). Taking the limit at infinity provides the weight of the point mass at zero (the proportion of zero eigenvalues)  $\lim_{z \rightarrow \infty} \eta_{\mathbf{H}, \mathbf{H}^*}(z) = \max(1 - \beta, 0)$ .

Central to our applications is the Shannon transform  $v(z) = \int_{\lambda_{min}}^{\lambda_{max}} \log(1 + x z) \tilde{\rho}(x) dx$ , also defined only for positive semi-definite matrices ( $[\lambda_{min}, \lambda_{max}] \subset \mathbb{R}^+$ ), with  $z \in \mathbb{R}^+$ . It is related to the  $\eta$  transform via  $v(z) = \int (1 - \eta(z))/z dz$ . For the scaled M-P law the Shannon transform is

$$v_{\mathbf{H}, \mathbf{H}^*}(z) = \beta \log \left( 1 + \zeta z - \frac{\phi(z)}{4} \right) + \log \left( 1 + \zeta z \beta - \frac{\phi(z)}{4} \right) - \frac{\phi(z)}{4 \zeta z} \quad , \quad (\text{A1.3})$$

Where  $\phi(\cdot)$  is given in eq.(A1.2).

The two next transforms are key to compute the LSD of sums or products of random matrices whose entries are drawn independently, more specifically matrices that are asymptotically free, meaning that their LSD are independent (see details on free probability in section 2.4 p. 77 of TULINO and VERDÙ 2004). In the next section, we will use these transforms to compute approximations of the spectral distribution of various covariance matrices in terms of an M-P law with modified parameters. The R transform is related to the Stieltjes transform via  $R(z) = S^{-1}(z) - 1/z$  where  $S^{-1}(\cdot)$  is the functional inverse of  $S$  such that  $S^{-1}(S(z)) = z$ . The R transform of the LSD of the sum of two matrices (**A** and **B**) with entries independently drawn is the sum of the components' R transforms:  $R_{\mathbf{A}+\mathbf{B}}(z) = R_{\mathbf{A}}(z) + R_{\mathbf{B}}(z)$ . For the scaled M-P law, the R transform is

$$R_{\mathbf{H}, \mathbf{H}^*}(z) = \frac{\beta \zeta}{1 - z \zeta} \quad . \quad (\text{A1.4})$$

The S transform plays the exact same role as the R transform for products of semi-definite matrices. It is related to the  $\eta$  transform via  $\Sigma(z) = -(z + 1)/z \eta^{-1}(z + 1)$  where  $\eta^{-1}(\cdot)$  is the functional inverse of  $\eta$ . The S transform of the LSD of the product of two positive semi-definite matrices (**A** and **B**), with entries independently drawn, is  $\Sigma_{\mathbf{A}, \mathbf{B}}(x) = \Sigma_{\mathbf{A}}(x) \Sigma_{\mathbf{B}}(x)$ . For the scaled M-P law, the S transform is

$$\Sigma_{\mathbf{H}, \mathbf{H}^*}(z) = \frac{1}{(\beta + z) \zeta} \quad . \quad (\text{A1.5})$$

Another formula will prove particularly useful in what follows: for any  $n \times n$  positive semi-definite matrix **T** whose LSD exists and has S transform  $\Sigma_{\mathbf{T}}(z)$ , we have (adapted from 2.216 p. 91 of TULINO and VERDÙ 2004):

$$\Sigma_{\mathbf{H}, \mathbf{T}, \mathbf{H}^*}(z) = \frac{z + 1}{z + \beta} \Sigma_{\mathbf{H}^*, \mathbf{H}} \left( \frac{z}{\beta} \right) \Sigma_{\mathbf{T}} \left( \frac{z}{\beta} \right) = \frac{1}{\zeta(z + \beta)} \Sigma_{\mathbf{T}} \left( \frac{z}{\beta} \right) \quad . \quad (\text{A1.6})$$

The last transform used here is the D transform, introduced in (BENAYCH-GEORGES and NADAKUDITI 2011). It will prove useful to predict the behavior of the maximal eigenvalue when the entries  $h_{ij}$  have non zero mean. In this article, it is defined in terms of the distribution of singular values of  $\mathbf{H}$  (when  $\mathbf{H} = \mathbf{H}_0$  has entries with a zero mean). As the singular values of  $\mathbf{H}$  are simply the square roots of the non zero eigenvalues of  $\mathbf{H} \cdot \mathbf{H}^*$ , the D transform in (BENAYCH-GEORGES and NADAKUDITI 2011) can also be expressed in terms of the spectral distribution of  $\mathbf{H} \cdot \mathbf{H}^*$ . More precisely, let  $\varphi(z) = \int_a^b z/(z^2 - x)\rho(x)dx = \eta(-1/z^2)/z$ , the D transform is  $D(z) = \varphi(z)(\varphi(z)/\beta + (1 - 1/\beta)/z)$  which, for the M-P law, yields

$$D_{\mathbf{H} \cdot \mathbf{H}^*}(z) = \frac{z^2}{2\beta\zeta^2} \left( \left( 1 - \sqrt{1 + \frac{\zeta((\beta - 1)^2\zeta - 2z^2(1 + \beta))}{z^4}} \right) - (1 + \beta)\zeta \right) \quad (\text{A1.7})$$

In what follows we use these transforms and their approximations to derive an M-P law approximation for the spectral distribution of  $\mathbf{M}$  when  $1 \ll n \ll p$ .

## B) Spectral distribution of $\mathbf{M}$ with high phenotypic integration

In this section, I study the matrix  $\mathbf{M}$  of mutational covariance among optimized traits, under the model of integrative phenotypic network described in **Figure 1**. I first describe its structure in detail, then derive an approximation of its LSD in terms of an M-P law.

**Structure of the mutational covariance matrix  $\mathbf{M}$ :** Matrix  $\mathbf{B} = \{b_{ij}\}_{i \in [1, n], j \in [1, p]}$  is an  $n \times p$  matrix of pathway coefficients given by the first derivatives of the developmental function about the parent phenotype. As explained in the main text, the  $1 \times p$  vector  $\mathbf{b}_i = \{b_{ij}\}_{j \in [1, p]}$  of the  $p$  pathway coefficients determining a given trait  $y_i$  is a single draw from a multivariate distribution. This distribution has mean vector  $\boldsymbol{\mu}_B$  and positive-definite  $p \times p$  covariance matrix  $\mathbf{C}_B$ . Otherwise the nature of these distributions is unspecified. As its entries are randomly distributed,  $\mathbf{M} = \mathbf{B} \cdot \mathbf{V} \cdot \mathbf{B}^*$  has the structure of a sample covariance matrix (BAI and SILVERSTEIN 2010).

In order to go any further, we must characterize the structure of  $\mathbf{M}$  in more mathematical detail. Let us first ignore any potential bias in the  $b_{ij}$  ( $\boldsymbol{\mu}_B = \mathbf{0}$ ) and denote by  $\mathbf{B}_0$  the matrix of pathway coefficients in this case. By assumption (8), the matrix  $\mathbf{B}_0$  can be decomposed into the product  $\mathbf{B}_0 = \mathbf{H} \cdot \mathbf{A}$  where  $\mathbf{H}$  is an  $n \times p$  matrix with independent entries  $h_{ij}$  with mean 0 and variance  $V(h_{ij}) = 1/n$ , and  $\mathbf{A}$  is a  $p \times p$  matrix introduced to generate the suitable covariance among  $b_{ij}$ 's (matrix bending). By this definition,  $\mathbf{C}_B = E(\mathbf{B} \cdot \mathbf{B}^*) = \mathbf{A}^* \cdot \mathbf{A}/n$ , which is positive-definite as required. The matrix  $\mathbf{A}$  can thus be set as  $\mathbf{A} = \sqrt{n} \mathbf{C}_B^{1/2}$ , the Cholesky decomposition of  $n \mathbf{C}_B$ , but there will typically be many other possibilities. By definition, a given draw of the matrix  $\mathbf{B}_0$  corresponds to a given draw of the matrix  $\mathbf{H}$ . This matrix  $\mathbf{H}$  is

the building block of most models of Random Matrix Theory, and we derive the structure of  $\mathbf{B} \cdot \mathbf{V} \cdot \mathbf{B}^*$  in terms of this building block.

From now on, we take the expectation  $E(\cdot)$  to mean the expected outcome of a given draw of the random coefficients  $b_{ij}$  (and the corresponding  $h_{ij}$ ). Importantly, the random entries in matrix  $\mathbf{H} \cdot \mathbf{H}^*$  are independent of  $\mathbf{C}_B$ . If we now consider the general model where  $\boldsymbol{\mu}_B \neq \mathbf{0}$ , the bias in the distribution of the pathway coefficients  $b_{ij}$  boils down to adding an  $n \times p$  matrix  $\mathbf{U}_B$  to  $\mathbf{B}_0$ . We can write  $\mathbf{B} = \mathbf{B}_0 + \mathbf{U}_B$  where  $\mathbf{B}_0 = \mathbf{H} \cdot \mathbf{A}$  and matrix  $\mathbf{U}_B$  has all its  $n$  line vectors equal to  $\boldsymbol{\mu}_B$ , so by construction  $\mathbf{U}_B$  has rank 1.

We can now derive the structure of the random matrix  $\mathbf{B} \cdot \mathbf{V} \cdot \mathbf{B}^*$ : it can be decomposed into  $\mathbf{B} \cdot \mathbf{V} \cdot \mathbf{B}^* = \mathbf{K} \cdot \mathbf{K}^*$  where  $\mathbf{K} = \mathbf{K}_0 + \mathbf{U}_K$  with  $\mathbf{K}_0 = \mathbf{H} \cdot \mathbf{A} \cdot \mathbf{V}^{1/2}$  and  $\mathbf{U}_K = \mathbf{U}_B \cdot \mathbf{V}^{1/2}$ . The singular values of  $\mathbf{K}_0$  are the square roots of the eigenvalues of  $\mathbf{K}_0 \cdot \mathbf{K}_0^* = \mathbf{H} \cdot \mathbf{W} \cdot \mathbf{H}^*$ , where  $\mathbf{W} = \mathbf{A} \cdot \mathbf{V} \cdot \mathbf{A}^*$  is a positive-definite  $p \times p$  matrix. The spectral distribution of  $\mathbf{W}$  is equal to that of  $n \cdot \mathbf{V} \cdot \mathbf{C}_B$ . Like  $\mathbf{U}_B$ , matrix  $\mathbf{U}_K$  is a rank 1 matrix by construction. Indeed, basic properties of the rank of matrix products imply that  $0 < \text{rank}(\mathbf{U}_K) \leq \min(\text{rank}(\mathbf{U}_B), \text{rank}(\mathbf{V})) = \min(1, p) = 1$ . Therefore,  $\mathbf{U}_K$  has a single non-zero singular value  $\theta$  which can be computed by using the fact that  $\mathbf{U}_K \cdot \mathbf{U}_K^*$  then has a single non-zero eigenvalue equal to  $\theta^2$  by definition. Therefore, its matrix trace  $\text{Tr}(\cdot)$  must satisfy  $\theta^2 = \text{Tr}(\mathbf{U}_K \cdot \mathbf{U}_K^*)$ . By construction of matrix  $\mathbf{U}_K = \mathbf{U}_B \cdot \mathbf{V}^{1/2}$ , we also have  $\text{Tr}(\mathbf{U}_K \cdot \mathbf{U}_K^*) = \boldsymbol{\mu}_B^* \cdot \mathbf{V} \cdot \boldsymbol{\mu}_B$  so the unique singular value of  $\mathbf{U}_K$  is  $\theta = \sqrt{\boldsymbol{\mu}_B^* \cdot \mathbf{V} \cdot \boldsymbol{\mu}_B}$ .

To summarize, matrix  $\mathbf{M}$  has the same eigenvalues as a (non-standard) sample covariance matrix  $\mathbf{K} \cdot \mathbf{K}^*$  where  $\mathbf{K} = \mathbf{K}_0 + \mathbf{U}_K$  with  $\mathbf{K}_0 = \mathbf{H} \cdot \mathbf{W}^{1/2}$  a ‘standard’ random matrix  $\mathbf{H}$  multiplied by a positive-definite ‘constant’ matrix  $\mathbf{W} = \mathbf{A} \cdot \mathbf{V} \cdot \mathbf{A}^*$ . Matrix  $\mathbf{U}_K$  is of rank 1 and its unique singular value is  $\theta = \sqrt{\boldsymbol{\mu}_B^* \cdot \mathbf{V} \cdot \boldsymbol{\mu}_B}$ . Both components are  $n \times p$  matrices. This whole decomposition argument is exemplified in the notebook **file S3**.

**Existence of the LSD of  $\mathbf{M}$ :** A cornerstone result of RMT is that the spectral distribution of  $\mathbf{H} \cdot \mathbf{H}^*$  admits a limit when  $n \cdot p \rightarrow \infty$ , given by the M-P law:  $\lambda_{H, H^*} \sim MP(p/n, 1)$ . In the absence of a bias among pathway coefficients ( $\boldsymbol{\mu}_B = \mathbf{0}$ ),  $\mathbf{M} = \mathbf{B}_0 \cdot \mathbf{B}_0^* = \mathbf{H} \cdot \mathbf{W} \cdot \mathbf{H}^*$  is a non-standard sample covariance matrix: as the entries of  $\mathbf{H}$  are independent of  $\mathbf{W}$ , the existence of an LSD for this matrix is also certain (chapter 4 of BAI and SILVERSTEIN 2010). This LSD is fully determined by that of  $\mathbf{W}$  and  $\mathbf{H} \cdot \mathbf{H}^*$  taken separately, and is still independent of the nature of the distributions of the entries in  $\mathbf{H}$ . Tools from RMT can then be used to compute explicit approximations for the LSD of such a matrix product. The effect of bias, as we will see, does not affect the existence of an LSD, as it only modifies the leading eigenvalue of  $\mathbf{M}$ .

**Approximation to the LSD of matrix  $\mathbf{M}$  when  $\boldsymbol{\mu}_B = \mathbf{0}$ :** Here, I describe how the LSD of the sample covariance matrix  $\zeta \mathbf{H} \cdot \mathbf{H}^*$  is modified by inner multiplication by the matrix  $\mathbf{W}$ , yielding the LSD of  $\mathbf{M} = \mathbf{H} \cdot \mathbf{W} \cdot \mathbf{H}^*$ .

As shown above, the matrix  $\mathbf{W} = \mathbf{A} \cdot \mathbf{V} \cdot \mathbf{A}^*$  is an unspecified positive-definite matrix, whose eigenvalues are the same as those of  $n \mathbf{V} \cdot \mathbf{C}_B$ . Overall,  $\mathbf{W}$  gathers all the correlation among mutation effects on mutable traits and among pathway coefficients within  $\mathbf{B}$ . It is impossible to have a general *a priori* knowledge on the structure of  $\mathbf{W}$ , so we must rely on an approximate treatment under less general conditions, in order to keep as much generality as possible regarding  $\mathbf{W}$ . This is possible if we assume that the phenotypic integration from mutable to optimized traits is high (our assumption (4):  $\beta = p/n \gg 1$ ).

First, let us note that the LSD of  $\mathbf{H} \cdot \mathbf{W} \cdot \mathbf{H}^*$  always exists as long as  $\mathbf{W}$  is positive-definite and has a bounded spectral distribution (Chapter 4 in BAI and SILVERSTEIN 2010). Under the additional assumption that  $n/p \rightarrow 0$  (or  $\beta \rightarrow \infty$ ), we can approximate eq. (A1.6) to obtain a simple limit for this LSD. Let  $\eta_{\mathbf{W}}(z)$  be the (unspecified)  $\eta$  transform of the spectral distribution of  $\mathbf{W}$ , and let  $\eta_{\mathbf{W}}^{-1}(x)$  be the functional inverse of this transform. From the relationship between  $\eta$  and S transforms ( $\Sigma(z) = -(z+1)/z \eta^{-1}(z+1)$ ) we can express eq. (A1.6) as  $\Sigma_{\mathbf{H} \cdot \mathbf{W} \cdot \mathbf{H}^*}(x) = -\eta_{\mathbf{W}}^{-1}(1+x/\beta)/x$ . Assuming that  $\beta$  is large, we can then take a series expansion of  $\eta_{\mathbf{W}}^{-1}(1+x/\beta)$  for small  $x/\beta$  which gives

$$\eta_{\mathbf{W}}^{-1}\left(1 + \frac{x}{\beta}\right) = \eta_{\mathbf{W}}^{-1}(1) + \frac{x}{\beta} \eta_{\mathbf{W}}^{-1\prime}(1) + \frac{x^2}{2\beta^2} \eta_{\mathbf{W}}^{-1\prime\prime}(1) + o\left(\frac{x}{\beta^2}\right) \quad (\text{A1.8})$$

This Taylor series can be expressed in terms of the derivatives of  $\eta_{\mathbf{W}}(z)$  taken at  $z = \eta_{\mathbf{W}}^{-1}(1) = 0$  (e.g. applying the method in KOEPF 1994), and we find that  $\eta_{\mathbf{W}}^{-1\prime}(1) = 1/\eta_{\mathbf{W}}'(0)$  and  $\eta_{\mathbf{W}}^{-1\prime\prime}(1) = -\eta_{\mathbf{W}}''(0)/(\eta_{\mathbf{W}}'(0)^3)$ . Recalling that the  $\eta$  transform is a moment generating function for the LSD ( $\eta[-z] = \sum_{k=0}^{\infty} z^k E(\lambda^k)$ ), we have  $\eta_{\mathbf{W}}^{-1\prime}(1) = -1/\zeta_{\mathbf{W}}$  and  $\eta_{\mathbf{W}}^{-1\prime\prime}(1) = 2(1 + cv_{\mathbf{W}}^2)/\zeta_{\mathbf{W}}$ , where  $\zeta_{\mathbf{W}}$  is the mean of the eigenvalues of  $\mathbf{W}$  and  $cv_{\mathbf{W}}$  is their coefficient of variation. Plugging these expressions into eq. (A1.8), we obtain a simple expression for the inverse  $\eta$  transform, which depends only on the mean and coefficient of variation of the eigenvalues of  $\mathbf{W}$ :

$$\eta_{\mathbf{W}}^{-1}\left(1 + \frac{x}{\beta}\right) \approx \frac{x^2(1 + cv_{\mathbf{W}}^2) - x\beta}{\zeta_{\mathbf{W}}\beta^2} + o\left(\frac{x}{\beta}\right)^2 \quad (\text{A1.9})$$

Plugging eq. (A1.9) into the formula  $\Sigma_{\mathbf{H} \cdot \mathbf{W} \cdot \mathbf{H}^*}(x) = -\eta_{\mathbf{W}}^{-1}(1+x/\beta)/x$ , we obtain a linear function of  $x$ : introducing the parameters  $\zeta_e = \zeta_{\mathbf{W}}(1 + cv_{\mathbf{W}}^2)$  and  $\beta_e = \beta/(1 + cv_{\mathbf{W}}^2)$ :

$$\Sigma_{\mathbf{M}}(x) = \Sigma_{\mathbf{H} \cdot \mathbf{W} \cdot \mathbf{H}^*}(x) = -\frac{\eta_{\mathbf{W}}^{-1}\left(1 + \frac{x}{\beta}\right)}{x} = \frac{1}{\zeta_e \beta_e} \left(1 - \frac{x}{\beta_e}\right) + o\left(\frac{x}{\beta^2}\right) \quad (\text{A1.10})$$

which can be rearranged into  $\Sigma_{\mathbf{M}}(x) = \zeta_e^{-1}(x + \beta_e)^{-1} + o(x\beta^{-2})$ . To first order in  $x/\beta^2$ , we retrieve the S transform of an M-P law (eq.(A1.5)) with parameters  $\zeta_e$  and  $\beta_e$ .

Therefore, we obtain a simple approximation to the LSD of the mutational covariance, accounting for arbitrary covariance matrices among mutation effects on metabolic traits or among

pathway coefficients. This approximation is to the second order in  $1/\beta$  and is thus relatively robust: it remains valid even when  $p$  is not much larger than  $n$ . All along, we made no assumption on the mean or variance of the spectral distribution of  $\mathbf{W}$  (on  $\zeta_{\mathbf{W}}$  or  $cv_{\mathbf{W}}^2$ ). Therefore, eq. (A1.10) remains valid even with high correlations and heterogeneity within  $\mathbf{V}$  or  $\mathbf{B}$ . As expected, we retrieve the original M-P law when  $\mathbf{W} = \zeta_{\mathbf{W}}\mathbf{I}_p$ : in this case  $cv_{\mathbf{W}}^2 = 0$  (all the eigenvalues of  $\mathbf{W}$  are equal to their mean  $\zeta_{\mathbf{W}}$ ) so that  $\beta_e = \beta$  and  $\zeta_e = \zeta_{\mathbf{W}}$ , and multiplication by  $\mathbf{W}$  results in a mere scaling.

Obviously, this derivation cannot claim full mathematical rigor: caution might be necessary on how the approximation of the S transform implies convergence in distribution to the corresponding LSD. Yet, **Figure 4.a** and other extensive simulations (not shown) do suggest that this approximation is valid: the convergence of the spectral distribution of  $\mathbf{M}$  to this modified M-P law is good, even with very high heterogeneity in the eigenvalues of  $\mathbf{W}$  (here  $cv_{\mathbf{W}}^2 = 2.1$ ).

**Effect of a non-zero mean in  $b_{ij}$ :** The above treatment describes the LSD of  $\mathbf{K}_0 \cdot \mathbf{K}_0^*$  that equals that of  $\mathbf{M}$  whenever the  $\mathbf{b}_i$ 's are unbiased ( $\boldsymbol{\mu}_{\mathbf{B}} = \mathbf{0}$ ), see main text. However, in general we want to allow for arbitrary  $\boldsymbol{\mu}_{\mathbf{B}} \neq \mathbf{0}$ . To do so, we rely on Theorem 2.9 of Benaych-Georges & Nadakuditi (2011) on the effect of small rank perturbations on the singular value distribution of random rectangular matrices (such as  $\mathbf{K}_0$ ). As the singular values of  $\mathbf{K}$  are simply the square roots of the eigenvalues of  $\mathbf{K} \cdot \mathbf{K}^*$  and thus of  $\mathbf{M}$ , this provides the required result.

Let us order the eigenvalues of  $\mathbf{M}$  in decreasing order ( $\lambda_1 \geq \lambda_2 \dots \geq \lambda_n > 0$ ). To generate  $\mathbf{K}$ , the random matrix  $\mathbf{K}_0$  (the standard one with zero mean entries) is “additively perturbed” by a small rank matrix  $\mathbf{U}_{\mathbf{K}}$ :  $\mathbf{K} = \mathbf{K}_0 + \mathbf{U}_{\mathbf{K}}$  has a number of singular values that differ from those of  $\mathbf{K}_0$ . When  $\mathbf{K}$  is a large random matrix, these differing eigenvalues are the  $r$  largest in general, where  $r$  is the rank of the perturbation matrix (BENAYCH-GEORGES and NADAKUDITI 2011). The perturbation  $\mathbf{U}_{\mathbf{K}}$  is of rank 1 with a unique singular value  $\theta = \sqrt{\boldsymbol{\mu}_{\mathbf{B}}^* \cdot \mathbf{V} \cdot \boldsymbol{\mu}_{\mathbf{B}}}$  (see above). Therefore, only the leading singular value  $\sqrt{\lambda_1}$  is affected by the perturbation, while all the lower singular values  $\sqrt{\lambda_i}$  of  $\mathbf{K}$  retain the same distribution as those of  $\mathbf{K}_0$ . The leading singular value  $\sqrt{\lambda_1}$  shows a phase transition behavior that is determined by what the Benaych-Georges and Nadakuditi dubbed the D-transform of the singular value distribution, which is the expectation  $D(z) = E_{\sigma}(z/(z^2 - \sigma_o))$  over the distribution of the singular values  $\sigma_o$  of the unperturbed matrix, in their notation. In our context, the unperturbed matrix is  $\mathbf{K}_0$ , and it is useful to express  $D(z)$  in terms of the eigenvalues  $\lambda_o = \sigma_o^2$  of  $\mathbf{K}_0$ . This gives:  $D(z) = E_{\lambda_o}(z/(z^2 - \lambda_o))$  over the spectral distribution of  $\mathbf{K}_0 \cdot \mathbf{K}_0^*$ . Now as we have seen above, the spectral distribution of  $\mathbf{K}_0 \cdot \mathbf{K}_0^*$  can be approximated by an M-P law:  $\lambda_o \sim MP(\beta_e, \zeta_e)$ , so the corresponding D transform is  $D_{\mathbf{H}, \mathbf{H}^*}(z)$  given above (eq.(A1.7)) for the M-P law.

To summarize: the effect of the bias in the  $b_{ij}$  is (i) no effect on the bulk of lower eigenvalues ( $\lambda_{i \neq 1} \sim MP(\beta_e, \zeta_e)$ ) and (ii) a “phase transition” behavior for the leading eigenvalue  $\lambda_1$ . Denote  $\theta_{th} = 1/\sqrt{D_{\mathbf{H}, \mathbf{H}^*}(\max \sigma_o)}$  the functional inverse of the D transform, taken at  $\max \sigma_o = \max \sqrt{\lambda_o}$ . Whenever  $0 \leq \theta^2 < \theta_{th}^2$ , all eigenvalues (including  $\lambda_1$ ) pertain to the M-P law so that  $\lambda_1 \rightarrow \max \lambda_o$

which is the expected maximum of the spectral distribution of the unperturbed matrix. However, whenever  $\theta^2 > \theta_{th}^2$ ,  $\lambda_1$  rises above the bulk of smaller eigenvalues, to a higher value  $\sqrt{\lambda_1} \rightarrow D_{\mathbf{H}\mathbf{H}^*}^{-1}(1/\theta^2)$ .

Using the M-P law approximation to the LSD of  $\mathbf{K}_0 \cdot \mathbf{K}_0^*$  ( $\lambda_o \sim MP(\beta_e, \zeta_e)$ ), the maximum of the M-P law is  $\max \sigma_o^2 = \max \lambda_o = (1 + \sqrt{\beta_e})^2 \zeta_e$ , so the threshold for the phase transition is

$$\theta_{th} = \frac{1}{\sqrt{D_{\mathbf{H}\mathbf{H}^*}(\max \sqrt{\lambda_o})}} = \beta_e^{1/4} \sqrt{\zeta_e} \quad \cdot \quad (\text{A1.11})$$

The limit reached by the leading eigenvalue beyond the phase transition depends on the functional inverse of the D transform of  $\lambda_o$ , which, for the M-P law, is (from eq. (A1.7)):

$$D_{\mathbf{H}\mathbf{H}^*}^{-1}(z) = \sqrt{\frac{(1 + z \zeta_e)(1 + z \zeta_e \beta_e)}{z}} \quad \cdot \quad (\text{A1.12})$$

This yields the limit:

$$\lambda_1 \xrightarrow{\theta > \theta_{th}} \left( D_{\mathbf{H}\mathbf{H}^*}^{-1}\left(\frac{1}{\theta^2}\right) \right)^2 = \frac{(\zeta_e + \theta^2)(\beta_e \zeta_e + \theta^2)}{\theta^2} \quad \cdot \quad (\text{A1.13})$$

We can express this result in more intuitively amenable terms. Define  $cv = \sqrt{Tr(\mathbf{C}_B \cdot \mathbf{V}) / (\boldsymbol{\mu}_B^* \cdot \mathbf{V} \cdot \boldsymbol{\mu}_B)}$ , which is analogous to a coefficient of variation of the means  $\mu_j$  but modified by the mutational covariance  $\mathbf{V}$ . When  $\mathbf{V} \propto \mathbf{I}_p$ , this is exactly the mean coefficient of variation of the linear coefficients  $b_{ij}$  across mutable traits  $x_j$ . Recall that  $\zeta_e = \zeta_W p/p_e$  and that the  $p \times p$  matrix  $\mathbf{W}$  has the same spectrum as  $n \mathbf{V} \cdot \mathbf{C}_B$ : its mean eigenvalue is therefore  $\zeta_W = Tr(n \mathbf{V} \cdot \mathbf{C}_B) / p = n/p Tr(\mathbf{C}_B \cdot \mathbf{V})$ . Putting this together, we get

$$\frac{\theta^2}{\theta_{th}^2} = \frac{\theta^2}{\sqrt{\beta_e \zeta_e}} = \frac{\sqrt{n p_e}}{cv^2} \quad \cdot \quad (\text{A1.14})$$

We see that when the bias in the coefficients  $b_{ij}$  is small enough,  $cv^2$  is large enough to outweigh  $\sqrt{n p_e}$ . By a “small enough bias”, we mean specifically that the cumulated variance of mutational effects on mutable traits, and of the linear coefficients is larger than  $\boldsymbol{\mu}_B^* \cdot \mathbf{V} \cdot \boldsymbol{\mu}_B$ . Otherwise, a phase transition appears and the leading eigenvalue rises above the bulk of lower eigenvalues, by a factor

$$\frac{\lambda_1}{E(\lambda_o)} \xrightarrow{\theta > \theta_{th}} \left(1 + \frac{n}{cv^2}\right) \left(1 + \frac{cv^2}{p_e}\right) \xrightarrow{p_e \rightarrow \infty} 1 + \frac{n}{cv^2} \quad \cdot \quad (\text{A1.15})$$



This is our eq. (6), except that we replaced  $\lambda_o$  (all eigenvalues of  $\mathbf{K} \cdot \mathbf{K}^*$  when  $\boldsymbol{\mu}_B = \mathbf{0}$ ) by  $\lambda_{i \neq 1}$  (the set of  $n - 1$  smallest eigenvalues, namely the “bulk” eigenvalues in the general situation (arbitrary  $\boldsymbol{\mu}_B$ ). The latter is distributed as  $\lambda_o$ , except that it is depleted of its maximal value  $\lambda_1$ , so it is very slightly (unnoticeably if  $n \gg 1$ ) biased downwards.

The accuracy of this result is checked **Figure 4b**. In this figure, the actual LSD of  $\mathbf{M}$  is not exactly the M-P law because of the covariances in mutable traits ( $\mathbf{V} \neq \mathbf{I}_p$ ) and pathway coefficients ( $\mathbf{C}_B \neq \mathbf{I}_p$ ), so that  $\mathbf{H} \cdot \mathbf{W} \cdot \mathbf{H}^* \neq \zeta_W \mathbf{H} \cdot \mathbf{H}^*$ . However, the prediction for the phase transition behavior, which is based on the M-P law approximation (derivation above), is accurate. This is simply because the behavior of  $\lambda_1$  is entirely determined by the spectral distribution of the unperturbed matrix ( $\lambda_o$ ), which was shown to be accurately captured by the M-P law approximation as long as  $n \ll p$  (e.g. **Figure 4a**).

**Extensions to allow for correlations among the rows of  $\mathbf{B}$ :** In the end of the Discussion, I stress the fact that in the model as formulated, it is impossible to have substantial correlations among the rows of  $\mathbf{B}$ , namely among the  $b_{ij}$ , across  $i$ , for a given  $j$ . This is because the covariance  $\mathbf{C}_B$  is of full rank  $p$ . A possible way to incorporate such correlations was suggested by one of the reviewers, by letting  $\mathbf{B} = \mathbf{A}_1 \cdot \mathbf{H} \cdot \mathbf{A}_2$  still  $n \times p$ , with  $\mathbf{A}_1$  an  $n \times n$  matrix and  $\mathbf{A}_2$  a  $p \times p$  matrix, both invertible (our model so far corresponds to  $\mathbf{A}_1 = \mathbf{I}_n$  and  $\mathbf{A}_2 = \mathbf{A}$ ). I provide a quick analysis of this case, but merely to illustrate how extensions can be made, and mostly in the form of conjectures rather than proofs. A full treatment of this more general model is beyond the scope of this article.

The covariance of  $b_{ij}$  among the rows  $i$  is now given by the  $p \times p$  matrix  $\mathbf{C}_2 = E(\mathbf{B}^* \cdot \mathbf{B}) = E((\mathbf{A}_2^* \cdot \mathbf{H}^* \cdot \mathbf{A}_1^*) \cdot (\mathbf{A}_1 \cdot \mathbf{H} \cdot \mathbf{A}_2))$ . When  $\mathbf{A}_1 = \mathbf{I}_n$  and  $\mathbf{A}_2 = \mathbf{A}$  (our former model), this gives  $\mathbf{C}_2 = \mathbf{C}_B = \mathbf{A}^* \cdot E(\mathbf{H}^* \cdot \mathbf{H}) \cdot \mathbf{A} = \mathbf{A}^* \cdot \mathbf{A} / n$ , as  $E(\mathbf{H}^* \cdot \mathbf{H}) = 1/n$ . Even in the general case ( $\mathbf{A}_1 \neq \mathbf{I}_n$ ), with  $n \ll p$  and  $\mathbf{A}_1 \cdot \mathbf{A}_1^*$  of full rank  $n$ , we have convergence to  $\mathbf{C}_2 \propto \mathbf{A}_2^* \cdot \mathbf{A}_2 / n$ . Conversely, the covariance of the  $b_{ij}$  among the columns  $j$  is now given by the  $n \times n$  matrix  $\mathbf{C}_1 = E(\mathbf{B} \cdot \mathbf{B}^*) = E((\mathbf{A}_1 \cdot \mathbf{H} \cdot \mathbf{A}_2) \cdot (\mathbf{A}_2^* \cdot \mathbf{H}^* \cdot \mathbf{A}_1^*))$ . In our former model  $\mathbf{C}_1 = E(\mathbf{H} \cdot \mathbf{A}_2 \cdot \mathbf{A}_2^* \cdot \mathbf{H}^*)$ : as  $n/p \rightarrow 0$  with  $\mathbf{A}_2 \cdot \mathbf{A}_2^*$  of full rank  $p$ , we get  $\mathbf{C}_1 \propto \mathbf{I}_n$ , and in the general case, we get  $\mathbf{C}_1 \propto \mathbf{A}_1 \cdot \mathbf{A}_1^*$ . Therefore the introduction of matrix  $\mathbf{A}_1$  does introduce a potential for correlations among the rows  $i$ , which is effectively negligible otherwise (provided  $n \ll p$  and  $\mathbf{C}_B$  is of full rank  $p$ ), as conjectured.

Let us now see how the mutational covariance  $\mathbf{M}$  is affected by multiplication of  $\mathbf{B}$  on the left by  $\mathbf{A}_1$ . In our extension, if we let  $\mathbf{M} = \mathbf{H} \cdot \mathbf{A}_2 \cdot \mathbf{V} \cdot \mathbf{A}_2^* \cdot \mathbf{H}^*$  be the former form of the mutational covariance, we now have  $\mathbf{M}' = \mathbf{A}_1 \cdot \mathbf{M} \cdot \mathbf{A}_1^*$ , as the new mutational covariance. The LSD of  $\mathbf{M}'$  is the same as that of  $\mathbf{C}_1 \cdot \mathbf{M}$  where we define  $\mathbf{C}_1 = \mathbf{A}_1 \cdot \mathbf{A}_1^*$  which is approximately the covariance matrix of  $b_{ij}$  among rows  $i$ . As the elements in  $\mathbf{C}_1$  are independent of those in  $\mathbf{H}$ ,  $\mathbf{M}'$  has S transform given by  $\Sigma_{\mathbf{M}'}(x) = \Sigma_{\mathbf{M}}(x) \Sigma_1(x)$  where  $\Sigma_1$  is the S transform of the LSD of  $\mathbf{C}_1$ .

We must now approximate each S transform. We have seen above that the LSD of  $\mathbf{M}$  is approximately the M-P law so that  $\Sigma_{\mathbf{M}}(x) = 1/(\zeta_e(x + \beta_e))$  with  $\zeta_e, \beta_e$  given above. I could not derive a general result for  $\Sigma_1(\cdot)$  without making an additional assumption. I assume that the spectral distribution

of  $\mathbf{C}_1$  is not widely spread. More precisely, define  $\lambda_{\mathbf{C}_1}$  and set, without loss of generality, that  $E(\lambda_{\mathbf{C}_1}) = 1$  (all the scaling can be absorbed into  $\zeta_e$ ). I assume that (i)  $v_1 = V(\lambda_{\mathbf{C}_1}) \ll 1$  and that (ii) the higher raw moments of the LSD of  $\mathbf{C}_1$  scale with this variance  $E(\lambda_{\mathbf{C}_1}^k) = 0(v_1^k)$  for all  $k \geq 2$ . This simply implies that the eigenvalues of  $\mathbf{C}_1$  are not too spread apart, corresponding to mild correlations among the rows of  $\mathbf{B}$ . In this case, we can find a first order approximation for the S transform of the LSD of  $\mathbf{C}_1$  and a corresponding approximation for the LSD of  $\mathbf{M}'$  again in terms of an M-P law with modified parameters. As for the rest of the Appendix, details of the computations can be found in the notebook **file S3**.

Define  $\eta_1(x) = E(1/(1 + \lambda_{\mathbf{C}_1}x))$  the  $\eta$  transform of the LSD of  $\mathbf{C}_1$  and  $\eta_1^{-1}(\cdot)$  the functional inverse such that  $z = \eta_1(\eta_1^{-1}(z))$ . First, take the Taylor series expansion for ratio:  $1/(1 + \eta_1^{-1}(z) \lambda_{\mathbf{C}_1})$  to order  $\lambda_{\mathbf{C}_1}^2$ ; then take expectations with respect to the distribution of  $\lambda_{\mathbf{C}_1}$ : this yields

$$z = \eta_1(\eta_1^{-1}(z)) = E\left(\frac{1}{1 + \eta_1^{-1}(z) \lambda_{\mathbf{C}_1}}\right) = \frac{(v_1 \eta_1^{-1}(z))^2}{(1 + \eta_1^{-1}(z))^3} + \frac{1}{1 + \eta_1^{-1}(z)} + O(v_1^{3/2}) \quad , \quad (\text{A1.16})$$

Solving for  $\eta_1^{-1}(z)$ , we retrieve four solutions, but only one has the correct behavior when  $v_1 \rightarrow 0$ : namely, it converges to the solution when all  $\lambda_{\mathbf{C}_1} = E(\lambda_{\mathbf{C}_1}) = 1$ , which is  $\eta_1^{-1}(z) = (1 - z)/z$ . Taking this solution, we can compute the S transform  $\Sigma_1(x)$  of  $\mathbf{C}_1$  under the approximation. The expression is analytic but unpractical. Yet, after taking a series of  $1/\Sigma_1(x)$  to leading order in  $v_1$ , we obtain an approximate expression:

$$\Sigma_1(x) = -\frac{x+1}{x} \eta_1^{-1}(x+1) \underset{v_1 \ll 1}{\approx} \frac{1}{1 + v_1 x} \quad . \quad (\text{A1.17})$$

Interestingly, this approximation is exact when  $\mathbf{C}_1$  is a sample covariance matrix, with LSD given by the M-P law ( $\lambda_{\mathbf{C}_1} \sim MP(\beta_1, 1/\beta_1)$  and arbitrary  $\beta_1 > 0$ ). Note that, in this particular case, this result should thus be valid for an arbitrary level of variation in the eigenvalues of  $\mathbf{C}_1$  (arbitrary  $\beta_1 > 0$ ).

Using eq. (A1.17), we can compute the S transform of the LSD of  $\mathbf{M}'$ :  $\Sigma_{\mathbf{M}'}(x) = \Sigma_{\mathbf{M}}(x)\Sigma_1(x) \approx 1/((x + \beta_e) \zeta_e (1 + v_1 x))$ . In general, this S transform is not related to any specific form of random matrix. However, when the ratio index of  $\mathbf{M} = \mathbf{H}_e \mathbf{H}_e^*$  is large ( $\beta_e \gg 1$ ), we retrieve a simple approximation in terms of an MP law. Taking the leading order when  $v_1 = o(1)$  while  $\beta_e v_1 = 0(1)$  ( $v_1 \ll 1$  and  $\beta_e \gg 1$ ), we get the S transform of an M-P law with modified parameters  $\zeta'_e = \zeta_e (1 + \beta_e v_1)$  and  $\beta'_e = \beta_e / (1 + \beta_e v_1)$ :

$$\Sigma_{\mathbf{M}'}(x) = \Sigma_{\mathbf{M}}(x)\Sigma_1(x) \underset{v_1 \ll 1}{\approx} \frac{1}{\zeta_e (x + \beta_e) (1 + v_1 x)} \underset{\beta_e \gg 1}{\approx} \frac{1}{\zeta'_e (1 + \beta'_e x)} \quad . \quad (\text{A1.18})$$

As expected, we retrieve the original MP law when  $v_1 \rightarrow 0$  (our former model:  $\mathbf{M}' = \mathbf{M}$ , with  $\beta'_e = \beta_e$ ). The approximation in eq. (A1.18) must break whenever  $v_1$  is large enough or  $\beta_e$  small enough that  $0 <$

$\beta'_e < 1$ . Indeed, in this case, the approximation would predict that a portion  $(1 - \beta'_e)$  of eigenvalues should be zero whereas in fact there are none ( $\beta_e > 1$  and  $\mathbf{C}_1$  is positive-definite). This sets a limit for the validity of eq. (A1.18): we must have  $0 < v_1 < (\beta_e - 1)/\beta_e$ , i.e.  $v_1 \leq 1$  in the best case scenario ( $\beta_e \rightarrow \infty$ ).

To conclude, the effect of correlations in the rows of  $\mathbf{B}$  is thus to further reduce the shape parameter of the LSD of the mutational covariance, while retaining the M-P law structure. When  $n/p \rightarrow \infty$ , so that  $\beta_e \propto \beta \rightarrow \infty$ , we retrieve a finite shape parameter this time:

$$\beta'_e = \frac{\beta_e}{(1 + \beta_e v_1)} \underset{\beta_e \rightarrow \infty}{\approx} \frac{1}{v_1} \quad \cdot \quad (\text{A1.19})$$

Then, there is mild anisotropy, all the more as  $v_1$  gets larger, namely as the rows of  $\mathbf{B}$  get more correlated. The effective dimensionality in the sense of the matching moment approximation in (MARTIN and LENORMAND 2006), is  $n_e = n/(1 + cv(\lambda)^2)$  where  $cv(\lambda)$  is the coefficient of variation of the eigenvalues of  $\mathbf{M}'$ . With our M-P law approximation we have  $cv(\lambda)^2 = 1/\beta'_e$  so that

$$n_e \underset{n \ll p}{\approx} \frac{n}{(1 + v_1)} \quad \cdot \quad (\text{A1.20})$$

In the main text, I refer directly to  $v_1 = cv_b^2$  as the coefficient of variation of the eigenvalues of the covariance matrix of the  $b_{ij}$  among rows  $i$ , to avoid stating the scaling  $E(\lambda_{C_1}) = 1$  that was made here for mere notational simplicity. Simulations (not shown) suggest that this new M-P law approximation is indeed accurate as long as  $v_1$  is small and  $\beta_e$  is large ( $0 < v_1 < (\beta_e - 1)/\beta_e$ ).

## References:

- BAI, Z., and J. W. SILVERSTEIN, 2010 *Spectral Analysis of Large Dimensional Random Matrices, 2nd Edition*.  
 BENAYCH-GEORGES, F., and R. R. NADAKUDITI, 2011 The eigenvalues and eigenvectors of finite, low rank perturbations of large random matrices. *Advances in Mathematics* **227**: 494-521.  
 KOEPF, W., 1994 Taylor polynomials of implicit functions, of inverse functions, and of solutions of ordinary differential equations. *Complex Variables, Theory and Application: An International Journal* **25**: 23-33.  
 MARTIN, G., and T. LENORMAND, 2006 A general multivariate extension of Fisher's geometrical model and the distribution of mutation fitness effects across species. *Evolution* **60**: 893-907.  
 TULINO, A. M., and S. VERDÙ, 2004 *Random Matrix Theory and Wireless Communications*. Now Publishers.  
 WOLFRAM RESEARCH, I., 2012 *Mathematica Edition: Version 9.0*, pp. Wolfram Research, Inc., Champaign, Illinois.
